# Supplementary material for: Forecasting Carbon Monoxide on a Global Scale for the ATom-1 Aircraft Mission: Insights from Airborne and Satellite Observations and Modeling
Source: Copernicus journal article supplement (doi:10.5194/acp-2018-150), 2018-03-19
Supplement: Supplementary file 1 [file acp-2018-150-supplement.pdf]

1 Table S1: Tagged tracer contributions (ppbv) to CO from GEOS-5 averaged over each ATom-1 Flight. The  
 2 columns represent total CO (totCO), other BB (bbot), N. American BB (bbna), S. American BB (bbsa), African  
 3 bb (bbaf), Eurasian BB (bbea), other non-BB (nbot), Asian non-BB (nbas), N. American non-BB (nbna), and  
 4 European non-BB (nbeu).

5

| flight | totCO | bbot  | bbna  | bbsa  | bbaf | bbea  | nbot | nbas | nbna  | nbeu  |
|--------|-------|-------|-------|-------|------|-------|------|------|-------|-------|
| 0      | 77.3  | 0.910 | 2.50  | 1.08  | 4.66 | 0.722 | 42.7 | 8.38 | 14.6  | 1.79  |
| 1      | 87.7  | 1.79  | 1.74  | 0.506 | 1.29 | 8.61  | 23.7 | 29.1 | 11.4  | 9.54  |
| 2      | 81.1  | 1.89  | 0.712 | 0.504 | 1.49 | 4.29  | 29.9 | 31.4 | 5.76  | 5.12  |
| 3      | 63.1  | 1.34  | 0.368 | 1.20  | 4.45 | 0.644 | 41.5 | 9.43 | 2.66  | 1.42  |
| 4      | 57.0  | 1.52  | 0.162 | 2.04  | 4.88 | 0.189 | 40.4 | 5.79 | 1.12  | 0.768 |
| 5      | 54.2  | 1.59  | 0.134 | 2.15  | 4.18 | 0.112 | 40.7 | 3.86 | 0.864 | 0.594 |
| 6      | 71.0  | 1.54  | 0.199 | 4.24  | 12.0 | 0.284 | 43.8 | 6.33 | 1.47  | 1.11  |
| 7      | 103   | 1.18  | 1.12  | 1.21  | 21.8 | 2.28  | 45.7 | 13.2 | 12.3  | 4.12  |
| 8      | 86.6  | 1.34  | 2.68  | 0.397 | 1.46 | 7.19  | 24.0 | 21.9 | 19.1  | 8.63  |
| 9      | 91.2  | 1.37  | 2.85  | 0.367 | 1.21 | 5.80  | 23.7 | 25.4 | 23.0  | 7.64  |
| 10     | 107   | 1.14  | 18.6  | 0.678 | 2.44 | 2.09  | 31.7 | 21.7 | 25.7  | 3.34  |

6

7

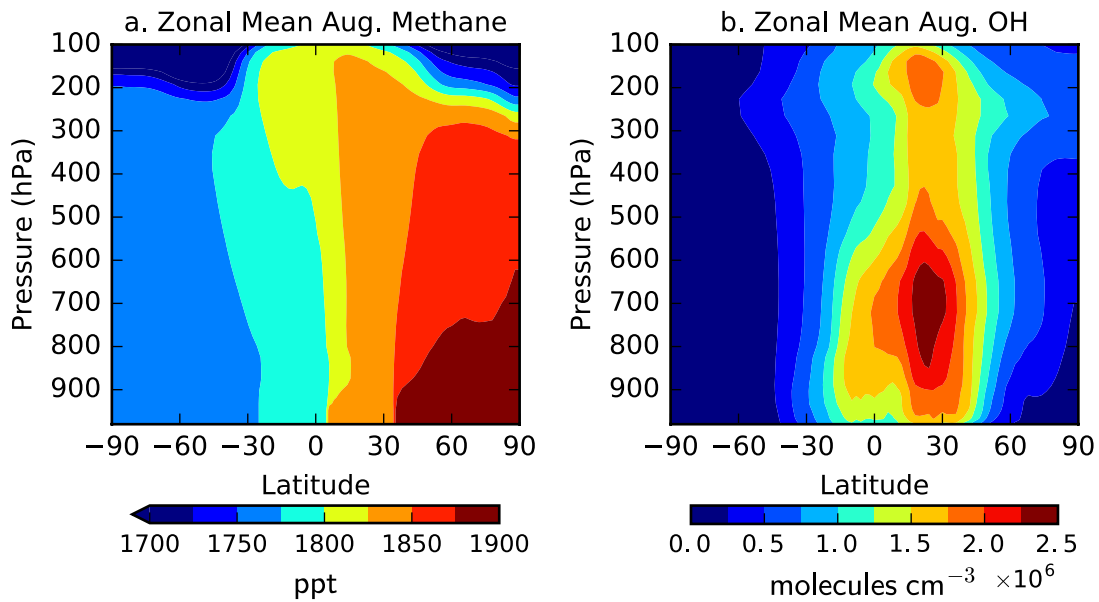

8

9

10

Fig. S1: The August zonal mean (a) methane concentrations and (b) OH concentrations used in the GEOS-5 FP CO simulation.

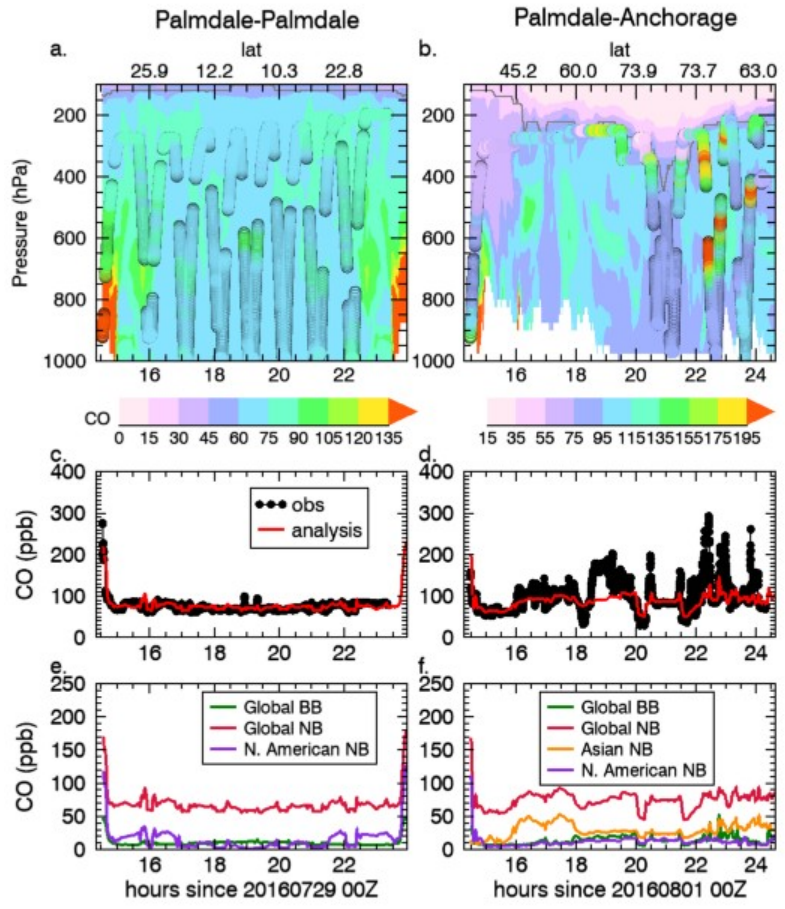

11  
12  
13  
14  
15

Fig. S2: Curtian plot of CO (ppb) from the GEOS-5 analysis as a function of time and pressure overplotted with QCLS CO observations (top row) for the a) Palmdale to Palmdale flight and b) Palmdale to Anchorage flight. The top x-axis indicates the latitudes of the flight track. c-d) The GEOS-5 CO interpolated to the flight track (red line) is compared to the observations (black circles). e-f) Tagged tracer contributions to the GEOS-5 CO.

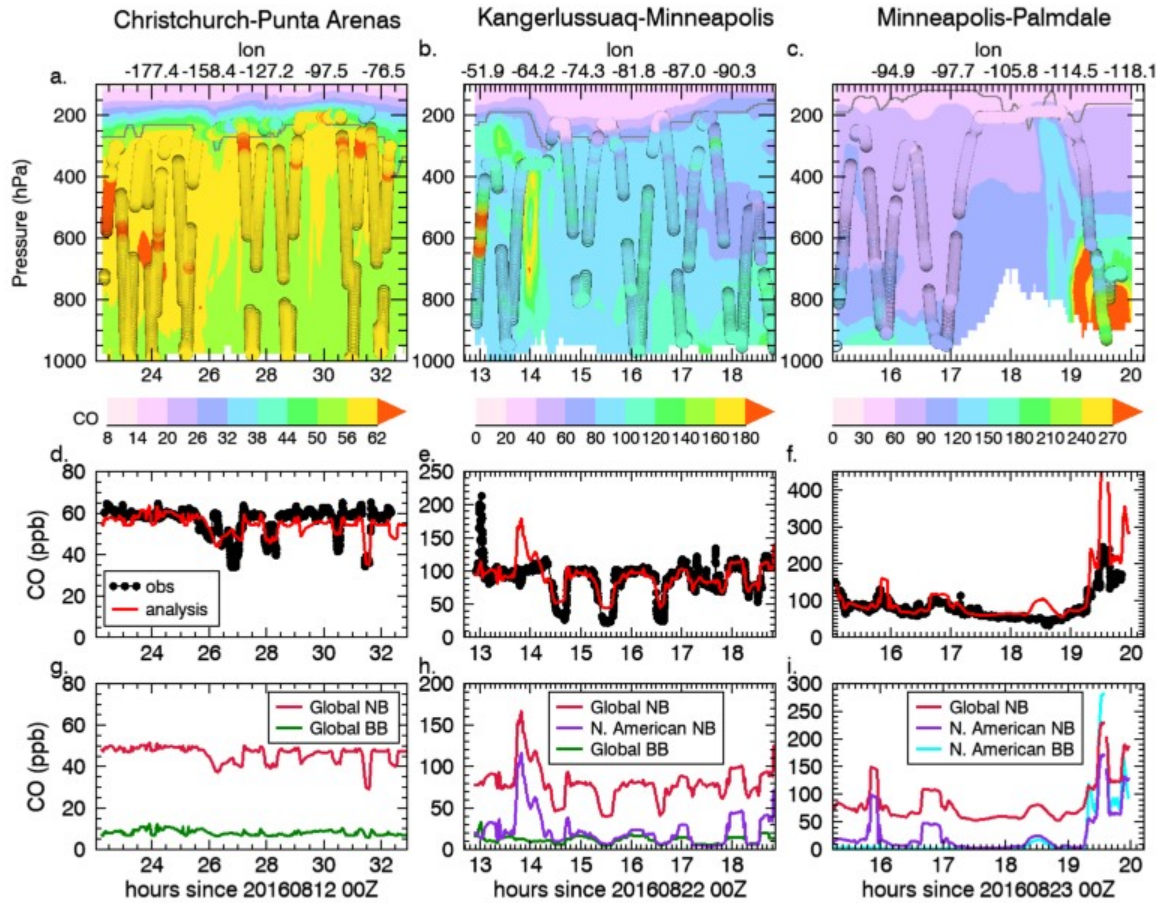

16

17 Fig. S3: Curtain plot of CO (ppb) from the GEOS-5 analysis as a function of time and pressure overplotted with  
 18 QCLS CO observations (top row) for the a) Christchurch to Punta Arenas flight, b) Kangerlussuaq to  
 19 Minneapolis flight, and c) Minneapolis to Palmdale flight. Axis ranges vary between panels due to the large  
 20 range of concentrations encountered. The top x-axis indicates the longitudes of the flight track. d-f) The GEOS-  
 21 5 CO interpolated to the flight track (red line) is compared to the observations (black circles). g-h) Tagged  
 22 tracer contributions to the GEOS-5 CO.

23

a. CO, 2016-08-20T06 UTC (30-hr fcst)

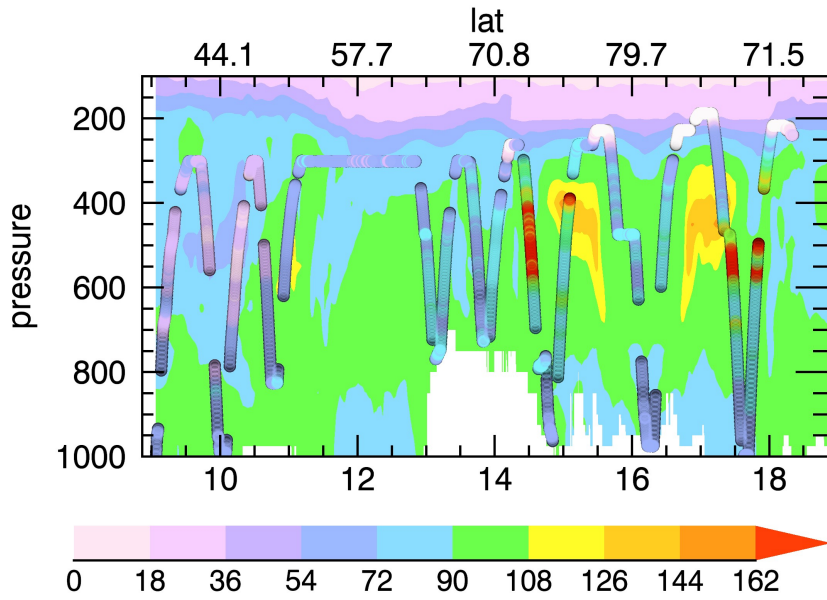

b. CO, 2016-08-20T12 UTC (36-hr fcst)

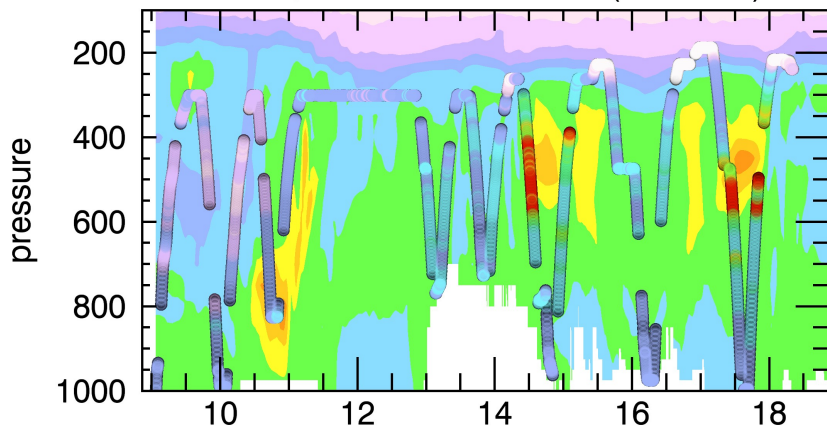

c. CO 2016-08-20

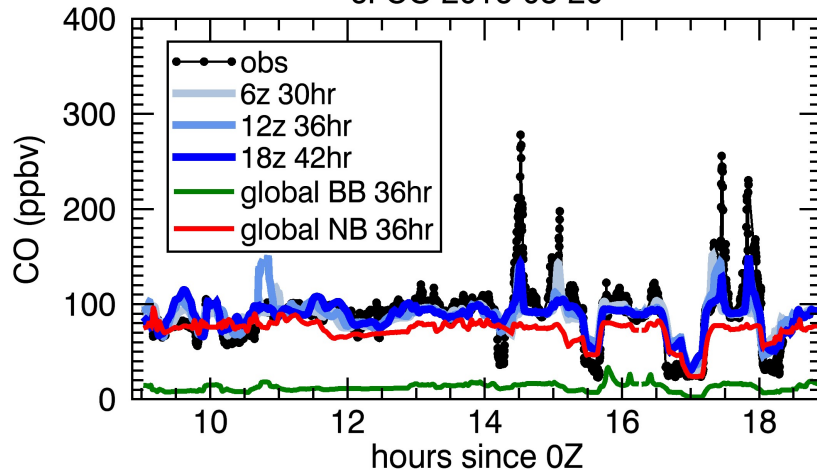

25 **Figure S4: Color contours of the GEOS-5 forecasted CO along the flight path of RF09 from Azores to**  
26 **Kangerlussuaq. The 30-hr forecast at 2016-08-20T6:00 (top) is compared with the 36-hr forecast (2016-08-**  
27 **20T12:00, middle). The ATom CO observations (circles) are pasted on both of these forecasts. (Bottom) time**  
28 **series of observed (black) and forecasted CO (blue) at different snap shot times (2016-08-20T6:00, 2016-08-**  
29 **20T12:00, 2016-08-20T18:00). It also shows the CO from global non-BB emissions (NB, red) and global biomass**  
30 **burning emissions (green).**

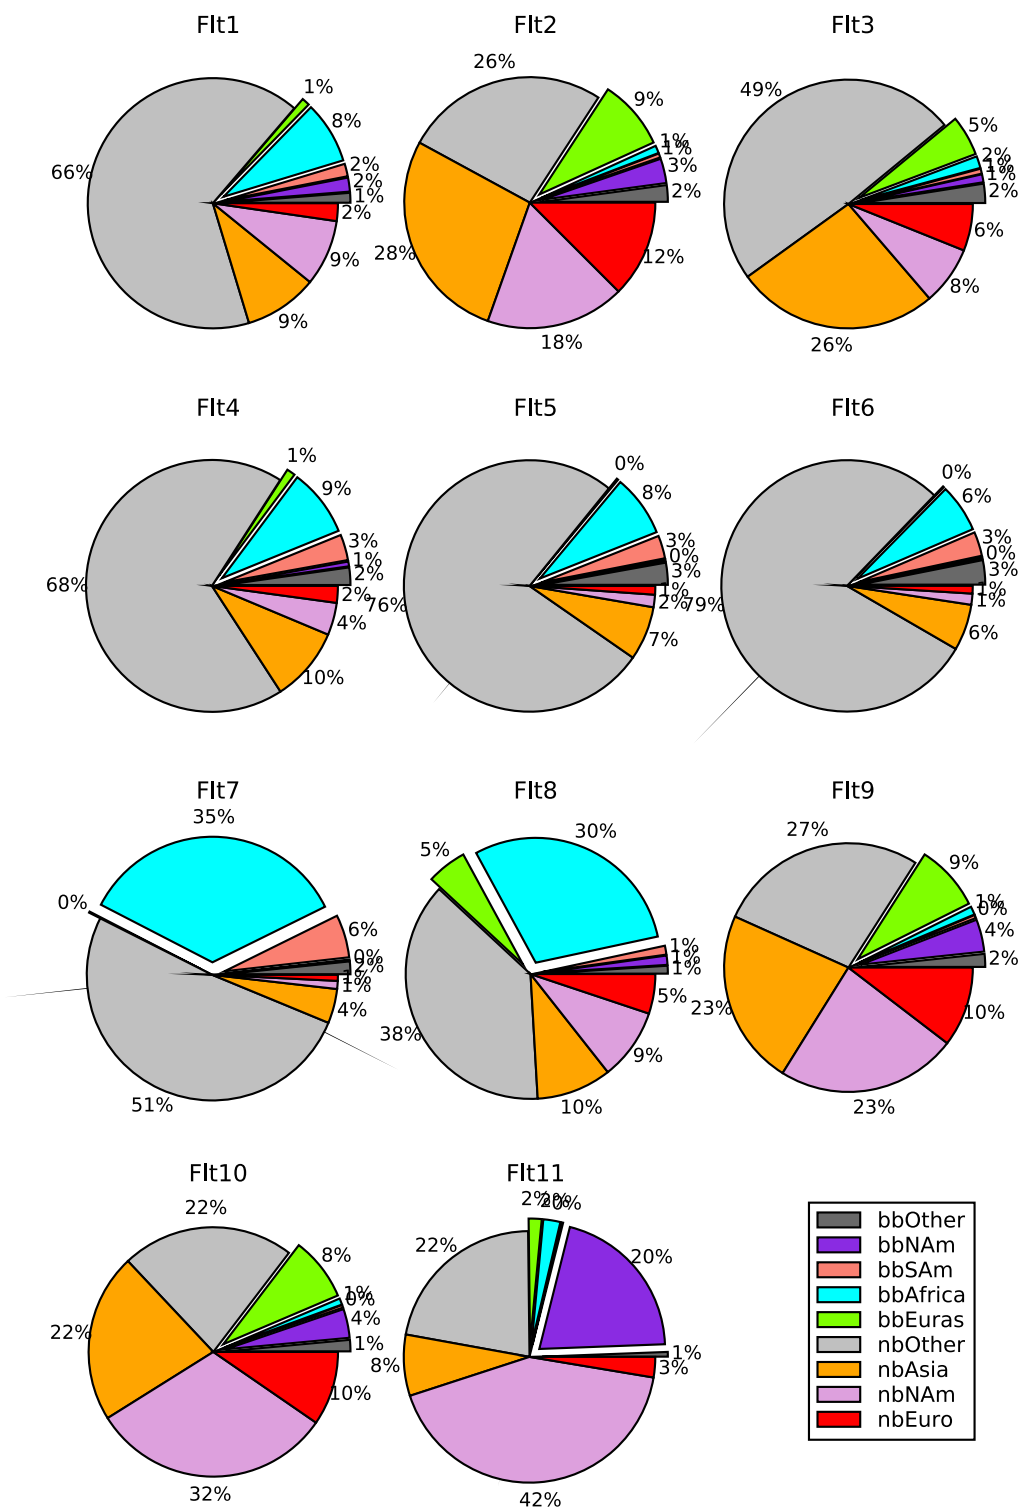

31

32 Fig. S5: Percent contributions of tagged tracers to total CO in the lower troposphere for each flight. Exploded  
 33 slices represent the biomass burning tracers: North American (purple), S. American (salmon), African (cyan),

34 Eurasian (green), and Other (dark gray). The non-biomass burning (nb) tracers are for Asia (orange), N.  
35 America (lavender), Europe (red), and other (light gray).
